# Supplementary material for: Local Interleukin-12 Treatment Enhances the Efficacy of Radiation Therapy by Overcoming Radiation-Induced Immune Suppression
Source: MDPI journal article supplement (doi:10.3390/ijms221810053), 2021-09-17
Supplement: s1 [file s1]

### **Supplementary Materials**

**Figure S1. IL-12 treatment delayed the decline of microvascular density post irradiation.** MVD of tumors was examined at day 1, day 7 and day 10 post-treatment by staining with endothelial cell marker, CD31. Relative MVD at indicated point was defined as the ratio of MVD of RT, IL-12 and combined modality compared to control group.  $N \geq 3$  in each group.  $*P < 0.05$ ,  $**P < 0.01$ .

**Figure S2. The expression of MIG and IP-10 was up-regulated in tumors with IL-12 treatment.** Gene expression of MIG and IP-10 in tumors of each group was examined by real-time PCR at day 7 after irradiation.  $**P < 0.01$ ,  $***P < 0.001$ .  $N = 4$  in each group.
